# Supplementary material for: A novel methodology for systematic study on molecular release from microscale reservoirs
Source: Royal Society of Chemistry journal article supplement (doi:10.1039/c2sm07355b), 2012-01-01
Supplement: c2sm07355b.pdf [file c2sm07355b.pdf]

Supporting information

## A Novel Methodology for Systematic Study on Molecular Release from Microscale Reservoirs

Dong Choon Hyun, Bongsoo Kim, ChooJin Park, and Unyong Jeong\*

*Department of Materials and Science, Yonsei University, 134 Shinchon-dong, Seoul, Korea*

*\*Correspondence to be addressed: ujeong@yonsei.ac.kr*

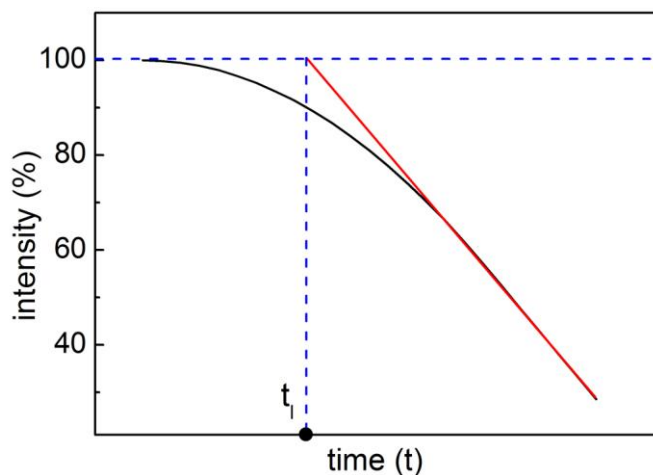

**Figure S1.** Scheme showing the time intercept ( $t_l$ ) for the time lag case.

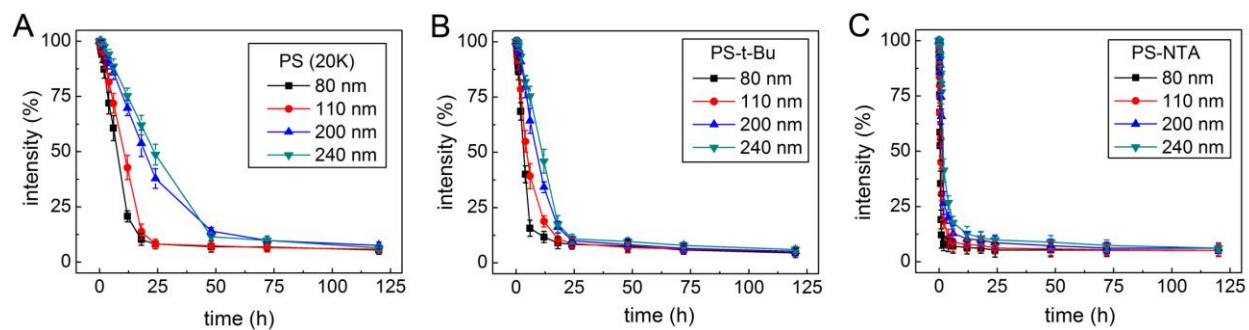

**Figure S2.** Release behavior of rhodamine B through the various polymer membranes with different thickness (A~C): (A) PS (20K), (B) PS-t-Bu, and (C) PS-NTA. Solid lines are guides to eyes.

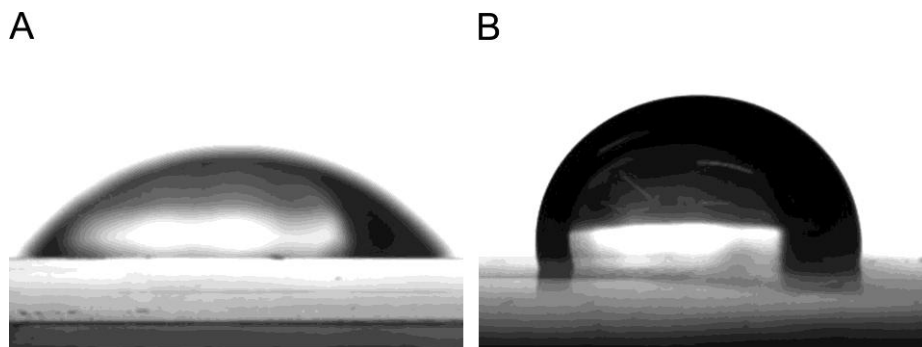

**Figure S3.** Water contact angle change on the PS-NTA surface: (A) before and (B) after the CF<sub>4</sub> plasma-treatment.
